# Supplementary material for: PGS/HAp Microporous Composite Scaffold Obtained in the TIPS-TCL-SL Method: An Innovation for Bone Tissue Engineering
Source: Int J Mol Sci. 2021 Aug 10;22(16):8587. doi: 10.3390/ijms22168587 (PMC8395318; doi:10.3390/ijms22168587)
Supplement: Supplementary file 1 [file ijms-22-08587-s001.zip › ijms-1321049-supplementary.pdf]

## Supporting Information

### **Osteoinductivity of PGS/HAp microporous composite scaffold obtained in the TIPS-TCL-SL method: an innovation for bone tissue engineering**

#### **1. Experimental section**

##### **NMR data**

Molar fraction of an unreacted glycerol was calculated according to the following equation (**equation S1**):

$$x_{UG} = \frac{I_{3.44-3.84ppm} - [2I_{(5)} + 4I_{(4)} + 2I_{(2)}]}{5} \text{ (Equation S1)}$$

where  $I_{3.44-3.84ppm} = I_{(4'')} + I_{(5')} + I_{(2'')} + I_{(UG)}$  is the area under the signal in the range from 3.44 to 3.84 ppm;  $I_{(5)}$  is the integral of the signal related to the methine proton in the terminal T2 glycidic unit,  $I_{(4)}$  is the integral of the signal related to the methine proton in the terminal T1 glycidic unit and  $I_{(2)}$  is the integral of the signal related to the methine proton in L12 diglycidic subunit.

The molar fraction of the L13 glycidic unit was determined according to the following equation (**equation S2**):

$$x_{L13} = 1 - [x_{L12} + x_D + x_{T1} + x_{T2} + x_{UG}] \text{ (Equation S2)}$$

where  $x_i$  is the molar fraction of the glycidic unit type<sup>[1]</sup>.

Carboxylic acid conversion ( $p_{COOH}$ ) was estimated by Lorentzian fitting of the overlapped signal  $a$  to derive the relative areas of component signals  $a'$  and  $a''$ , related to the monoester- and diester type of sebacate subunit. Then the conversion of carboxyl groups was calculated according to the following equation (**equation S3**):

$$p_{COOH} = \frac{I_{a''}}{I_{a'} + I_{a''}} \text{ (Equation S3)}$$

where  $I_{a'}$  and  $I_{a''}$  are the integrals of the monoester- and diester-type of sebacate unit, respectively. The degree of substitution (DS), hydroxyl conversion ( $p_{OH}$ ), number average degree of polymerization (DP) and degree of branching (DB) were calculated according to the methodology reported elsewhere<sup>[1,2]</sup>. All of the parameters describing pPGS prepolymer derived from  $^1H$  NMR spectrum are presented in **Table S1**

## Water contact angle measurement

Water contact angle measurements were conducted with a PG-X contact angle goniometer (Testing Machines, Inc.). Nine measurements were carried out for each specimen. The mean value was calculated as the standard deviation.

## 2. Results

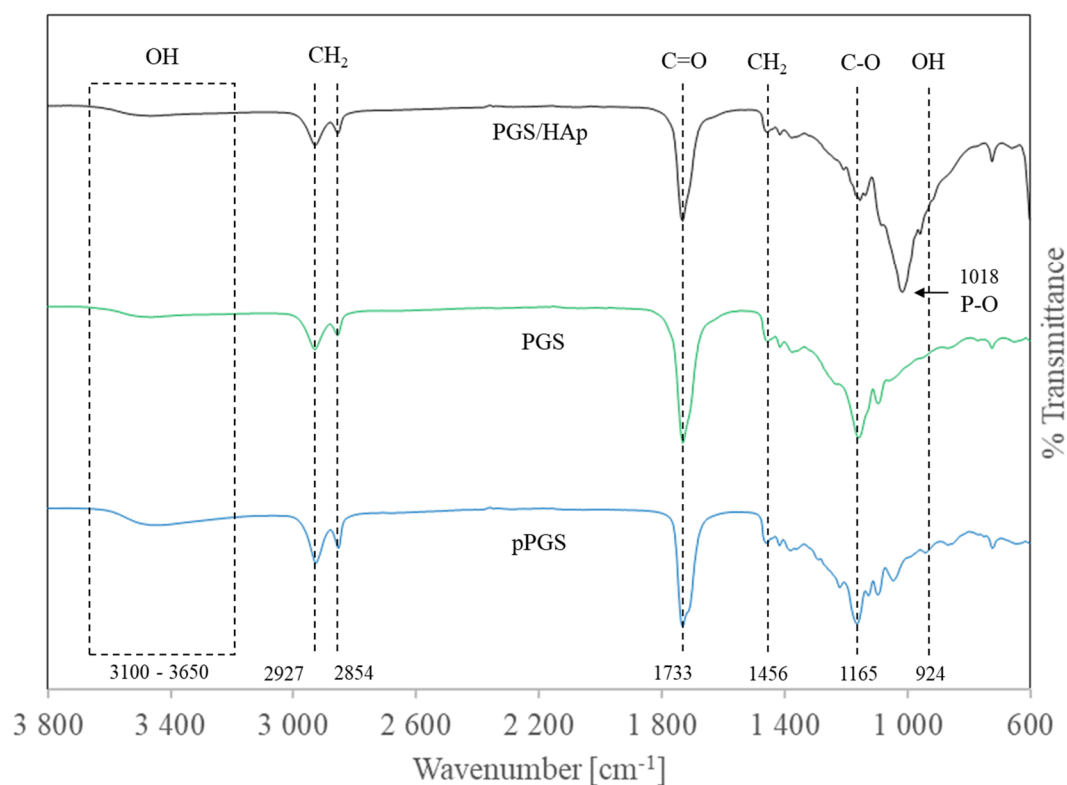

**Figure S1.** ATR-FTIR spectra of pPGS, PGS and PGS/HAp

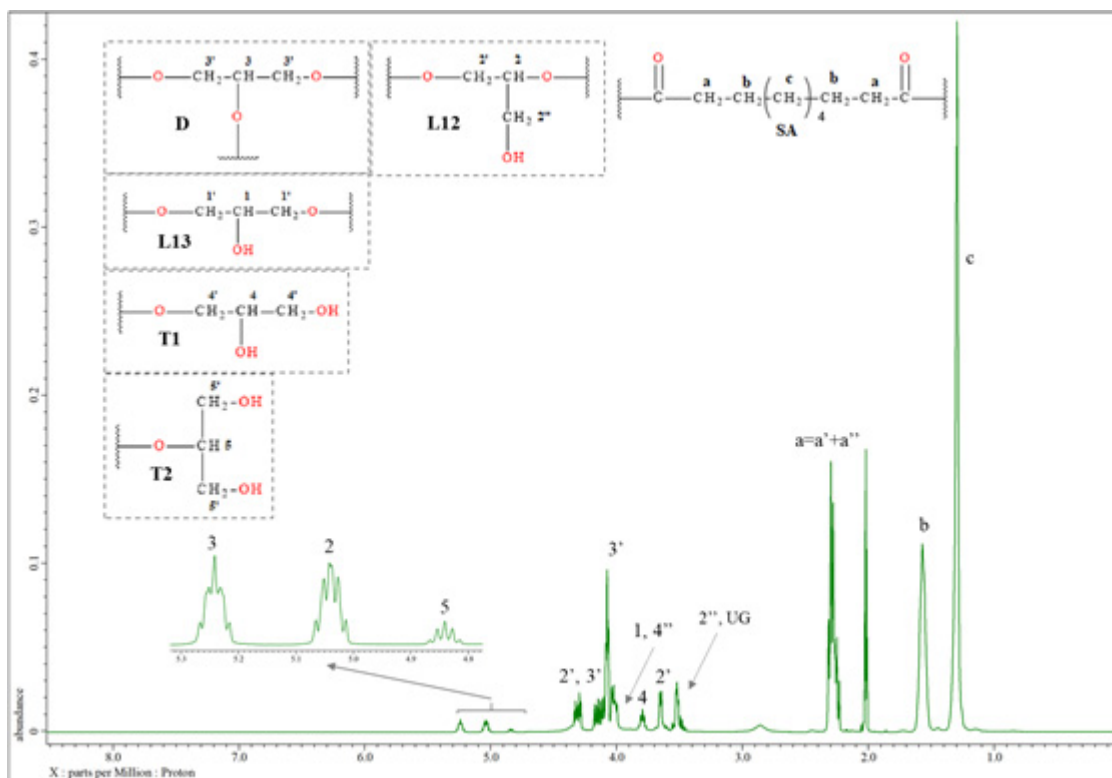

**Figure S2.**  $^1\text{H}$  NMR spectrum in  $(\text{CD}_3)_2\text{CO}$  of pPGS prepolymer with signals assignment (T1, T2 – terminal glyceridic units, L12, L13 – diglyceridic unit, D – triglyceridic unit, UG – unreacted glycerol, SA – sebacate subunit)

**Table S1.** Pre-polymer parametrs determined by  $^1\text{H}$  NMR ( $x_i$  – average molar fraction of different types of glyceridic units in reaction medium,  $p_{\text{COOH}}$  – carboxylic acid conversion,  $p_{\text{OH}}$  – hydroxyl groups conversion, DP – average degree of polymerization, DS – degree of substitution, DB – degree of branching)

| $x_{\text{UG}}$ | $x_{\text{T1}}$ | $x_{\text{T2}}$ | $x_{\text{DG1,2}}$ | $x_{\text{DG1,3}}$ | $x_{\text{TG1,2,3}}$ | $p_{\text{OH}}$ | $p_{\text{COOH}}$ | DP   | DB   | DS   |
|-----------------|-----------------|-----------------|--------------------|--------------------|----------------------|-----------------|-------------------|------|------|------|
| <b>0.03</b>     | 0.24            | 0.03            | 0.16               | 0.38               | 0.16                 | 0.63            | 0.91              | 10.2 | 0.37 | 1.89 |

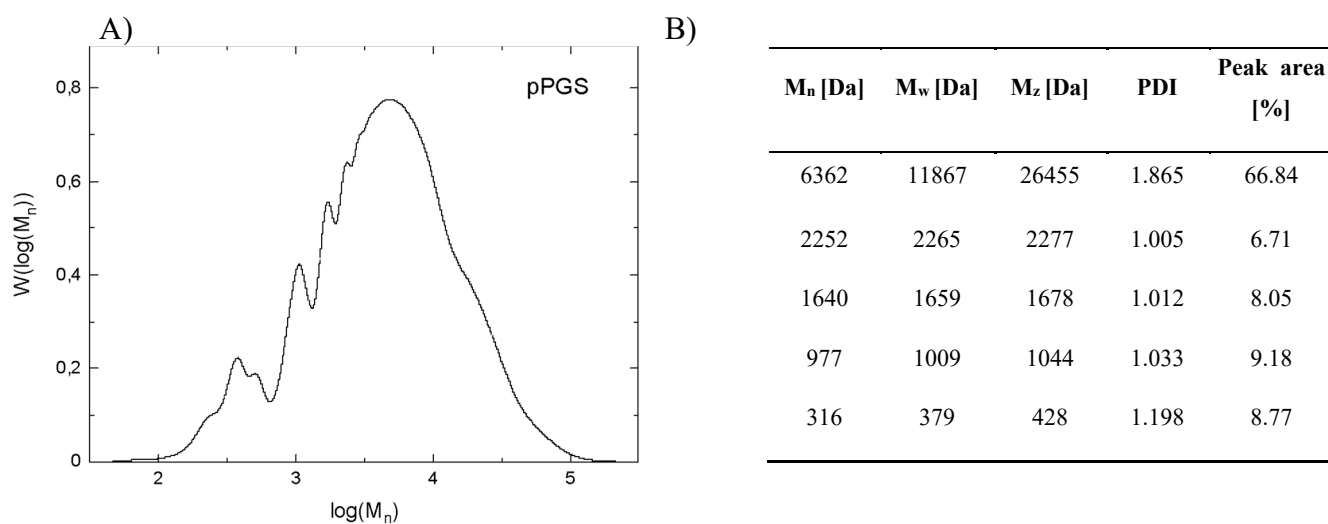

**Figure S3.** A) molecular weight distribution plot for pPGS, B) molecular weight distribution characterization

## References

- [1] G. B. Perin, M. I. Felisberti, *Macromolecules* **2020**, *53*, 7925.
- [2] C. Moorhoff, Y. Li, W. D. Cook, C. Braybrook, Q.-Z. Chen, *Polym. Int.* **2015**, *64*, 668.
